# Supplementary material for: Rictor/mTORC2 Is Essential for Maintaining a Balance Between β-Cell Proliferation and Cell Size
Source: PubMed Central journal article supplement — Diabetes. 2011 Feb 21;60(3):827–37. doi: 10.2337/db10-1194 (PMC3046843; doi:10.2337/db10-1194), 2011-02-21

SUPPLEMENTARY DATA

**Supplementary Table 1. Primer/probe sets used for TaqMan Low Density Arrays (TLDA).**

| <b>Gene</b>  | <b>ABI Identification number</b> |
|--------------|----------------------------------|
| Irs2         | Mm03038438 m1                    |
| Akt1         | Mm01331624 m1                    |
| Akt2         | Mm00545827 m1                    |
| Foxo1        | Mm00490672 m1                    |
| PKC $\alpha$ | Mm00440858 m1                    |
| SGK1         | Mm00441380 m1                    |
| Skp2         | Mm00449925 m1                    |
| Pten         | Mm00477210 m1                    |
| Rictor       | Mm01307318 m1                    |
| Syntaxin-1   | Mm00444008 m1                    |
| Snap25       | Mm00456921 m1                    |
| Vamp2        | Mm00494118 g1                    |
| Munc8a       | Mm00436837 m1                    |
| connexin36   | Mm00439121 m1                    |
| Ezh2         | Mm00468449 m1                    |
| Bmi1         | Mm03053308 g1                    |
| Prdm16       | Mm00712556 m1                    |
| Men1         | Mm00484963 m1                    |
| Cdk4         | Mm00726334 s1                    |
| Ccnd2        | Mm00438072 m1                    |
| Cdc25a       | Mm00483162 m1                    |
| p16          | Mm01257348 m1                    |
| p18          | Mm00483243 m1                    |
| p21          | Mm00432448 m1                    |
| p27          | Mm00438168 m1                    |
| p19          | Mm00486943 m1                    |
|              |                                  |

SUPPLEMENTARY DATA

**Supplemental Table 2: Antibodies used.**

|                             | <b>Antibodies</b>                      | <b>Dilution used for immunocytochemistry</b> | <b>Dilution used for Western blots</b> | <b>Source</b>          |
|-----------------------------|----------------------------------------|----------------------------------------------|----------------------------------------|------------------------|
| <b>Primary Antibodies</b>   | Rat anti-BrdU                          | 1:500                                        |                                        | Accurate Chemical      |
|                             | Mouse anti-Ki67                        | 1:400                                        |                                        | Benton Dickenson       |
|                             | Rabbit anti-Glut2                      | 1:1000                                       |                                        | Bernard Thorens        |
|                             | Guinea pig anti-Insulin                | 1:1000                                       |                                        | Linco                  |
|                             | Rabbit anti-Cre                        | 1:1000                                       |                                        | Clone-Tech             |
|                             | Rabbit anti-PDX1                       | 1:4000                                       | 1:10000                                | Chris Wright's Lab     |
|                             | Rabbit anti-FoxO1                      | 1:50                                         | 1:500                                  | Cell signaling         |
|                             | Rabbit anti-FoxO1                      | 1:100                                        |                                        | Santa-Cruz             |
|                             | Rabbit anti-Rictor                     |                                              | 1:1000                                 | Bethyl                 |
|                             | Rabbit anti-Pten                       |                                              | 1:2000                                 | Cell Signaling         |
|                             | Rabbit anti-AKT                        |                                              | 1:4000                                 | Cell Signaling         |
|                             | Rabbit anti-pAKT-S473                  |                                              | 1:1000                                 | Cell Signaling         |
|                             | Rabbit anti-pAKT-T308                  |                                              | 1:1000                                 | Cell Signaling         |
|                             | Rabbit anti-S6                         |                                              | 1:2000                                 | Cell Signaling         |
|                             | Rabbit anti-PS6                        |                                              | 1:2000                                 | Cell Signaling         |
|                             | Mouse anti-p27                         |                                              | 1:4000                                 | Benton Dickenson       |
| Rabbit anti-GAPDH           |                                        | 1:6000                                       | Santa-Cruz                             |                        |
| Mouse anti-PCAF             |                                        | 1:1000                                       | Santa-Cruz                             |                        |
| <b>Secondary Antibodies</b> | Goat anti Guinea Pig Alexa Fluor 488   | 1:500                                        |                                        | Invitrogen             |
|                             | Goat anti Rabbit Alexa Fluor 488       | 1:500                                        |                                        | Invitrogen             |
|                             | Donkey anti Rabbit Alexa Fluor 555     | 1:500                                        |                                        | Invitrogen             |
|                             | Donkey anti mouse cy3                  | 1:500                                        |                                        | Jackson ImmunoResearch |
|                             | Donkey anti Rabbit conjugated with HRP |                                              | 1:10,000                               | Jackson ImmunoResearch |
|                             | Donkey anti Mouse conjugated with HRP  |                                              | 1:10,000                               | Jackson ImmunoResearch |

SUPPLEMENTARY DATA

**Supplementary Figure 1. Analysis of insulin sensitivity and measurement of area under curve of insulin secretion.**  $\beta$ RicKO mice were observed to have impaired glucose-stimulated insulin secretion but no change in insulin sensitivity. **A:** Intraperitoneal insulin tolerance tests were performed at 12 weeks of age. Blood glucose concentrations were tested at 0, 15, 30, 45, 60 and 90 min after insulin injection. There was no significant difference of blood glucose reduction after insulin injection at each time point was observed between groups. **B:** Area under glucose curve during insulin tolerance test showed no significance difference of total glucose reduction in respond to insulin injection in different genotypes. **C:** The area under insulin curve (AUC) and increment of AUC (IAUC).  $\beta$ RicKO mice had a lower IAUC value than Dlox. There was no difference in the AUC or IAUC between the  $\beta$ RicKO and  $\beta$ DKO mice. **D:** Area under insulin secretion curve during islet perfusion test (n = 3). Islets from both the  $\beta$ RicKO and  $\beta$ PtenKO mice showed significantly lower AUC than did islets from the Dlox control mice. \* $P < 0.05$ , § $P = 0.07$ .

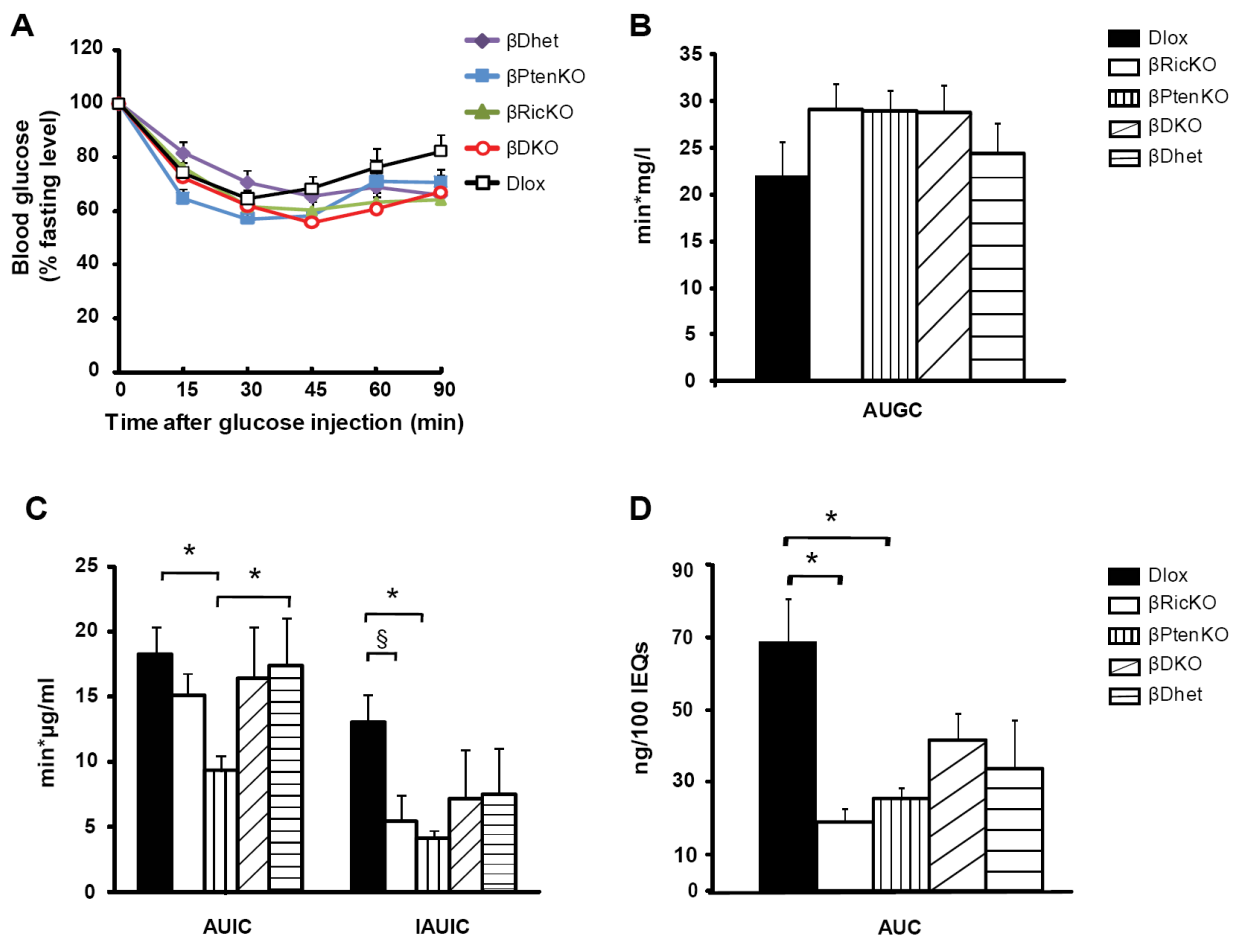

## SUPPLEMENTARY DATA

**Supplementary Figure 2. Insulin immunolabeling of mouse pancreas.** Representative images showing immunohistochemical labeling of insulin for each the four mouse genotypes is shown. A positive insulin signal is indicated by brown color stain (DAB). Cells were counterstained with Eosin.  $\beta PtenKO$  mice had the largest  $\beta$  cell mass compared to other genotypes. All images were acquired at 100X magnification. The percentage of insulin-positive area to pancreatic area for all sections and  $\beta$  cell mass (ratio of insulin-positive area multiplied times pancreas weight) were calculated.  $\beta$  cell mass was calculated from 3-4 animals of each genotype, as described previously. As shown in Fig. 2A,  $\beta$  cell mass was reduced in the  $\beta RicKO$  mice and elevated in the  $\beta PtenKO$  lines compared to the control and  $\beta DKO$  groups.

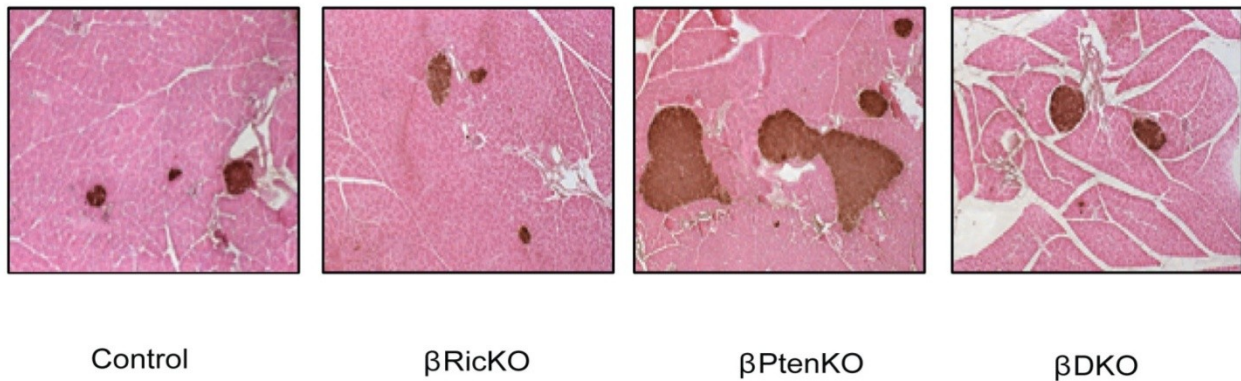

SUPPLEMENTARY DATA

**Supplementary Figure 3. Analysis of cell proliferation by counting Ki67 and Cre double-positive cells.** Pancreas sections from the four different genotypes were labeled by immunostaining for both Ki67 and Cre. Images were taken using a confocal microscope. **(A)** Percentage of double-positive cells at both E17.5 and 12 weeks.  $**P < 0.01$ ,  $*P < 0.05$ . 3-4 animals in each group. For adults, more than 1,500 cells from at least 50 islets of each animal were counted. For embryos, more than 500 cells were counted.  $\beta Dhet$  mice served as the control. **(B)** Representative images of double-labeling of Ki67 (red) and Cre (green) in both embryonic and adult pancreas. Ki67/Cre double-positive cells are indicated by white arrows. Scale bar = 20 $\mu$ m.

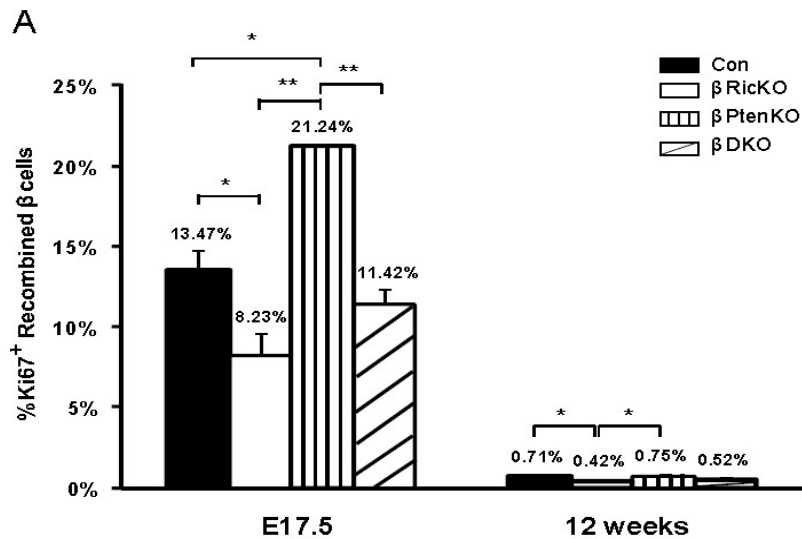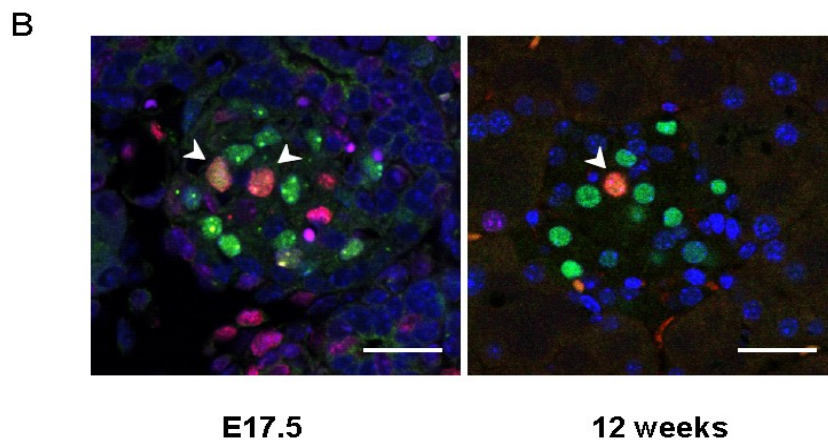

SUPPLEMENTARY DATA

**Supplementary Figure 4. Differential subcellular location of Pdx1 in pancreatic  $\beta$  cells. (A, B, C, D) Immunolabeling of Pdx1 (red) in pancreatic islets. (E, F, G, H) Double immunolabeling of Pdx1 (red) and insulin (green). (A, E) Control islets. Pdx1 was detected mainly in the nucleus; however, cytoplasmic expression was detected in a few cells, as indicated by white arrows. (B, F)  $\beta Ric$ KO islets. Nuclear labeling of Pdx1 was reduced compared to control group. (C, G)  $\beta Pten$ KO islets. More nuclear Pdx1 accumulation is seen. (D, H)  $\beta DKO$  control islets. Nuclear localization is similar to that of the control group. Scale bar = 20 $\mu$ m**

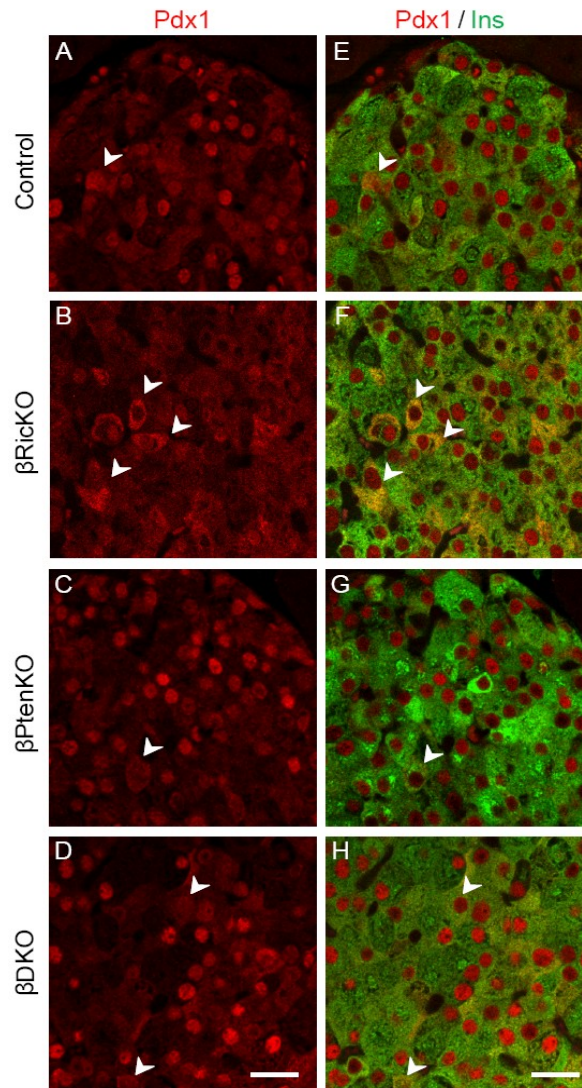

SUPPLEMENTARY DATA

**Supplementary Figure 5.  $\beta$  cell apoptosis is not affected in the absence of Rictor.** Pancreas sections from the four different genotypes were immunolabeled for insulin and TUNEL. All images were acquired at 400X magnification. The left image in the upper panel shows TUNEL labeling of a single exocrine cells and the right image shows TUNEL labeling of a single  $\beta$  cell. The lower panel shows the number of islets which contained at least one TUNEL-positive cell. At least 110 islets for each genotype were examined at 12 weeks of age. No significant differences were observed.

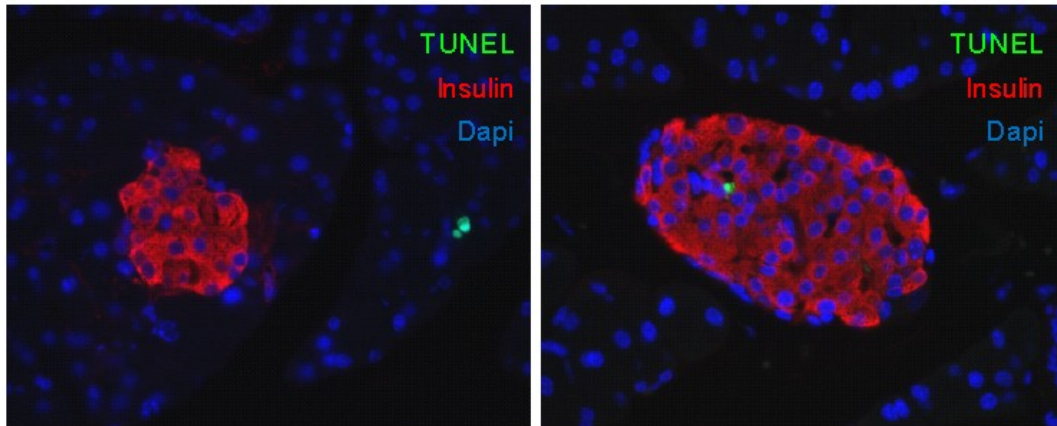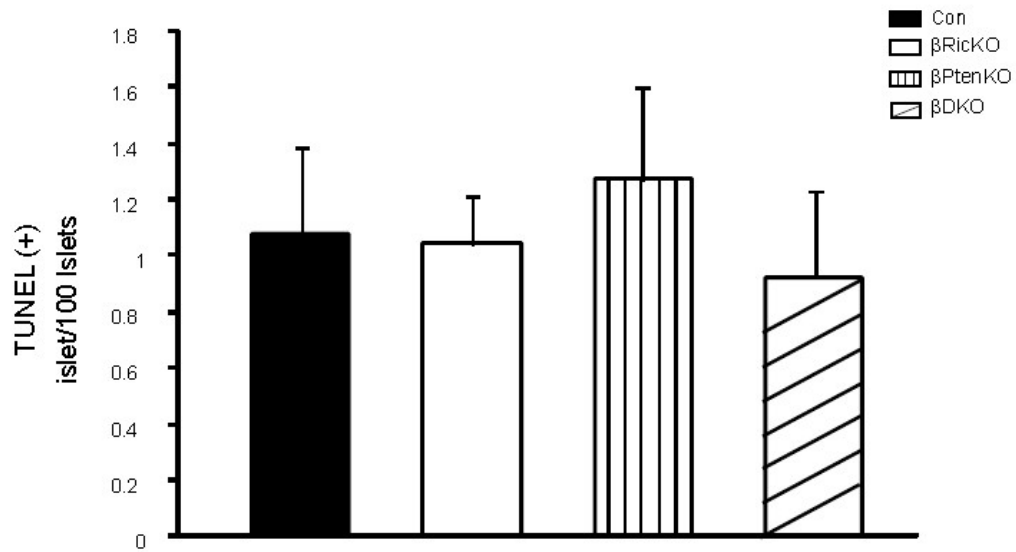

SUPPLEMENTARY DATA

**Supplementary Figure 6. Analysis of in nuclear and/cytoplasmic FoxO1.** The nuclear and cytoplasmic protein extracts of islets from the four genotypes of mice were prepared and immunoblotted for Foxo1. The right four lanes show an immunoblot of cytosolic (Cyto) proteins and the left four lanes are of nuclear (Nuc) proteins. PCAF, a p300/CBP-associated factor, was used as the loading control for nuclear proteins and GAPDH was used as the loading control for cytosolic proteins. Each lane contains the islet nuclear/cytoplasmic protein from 3 animals of each genotype.

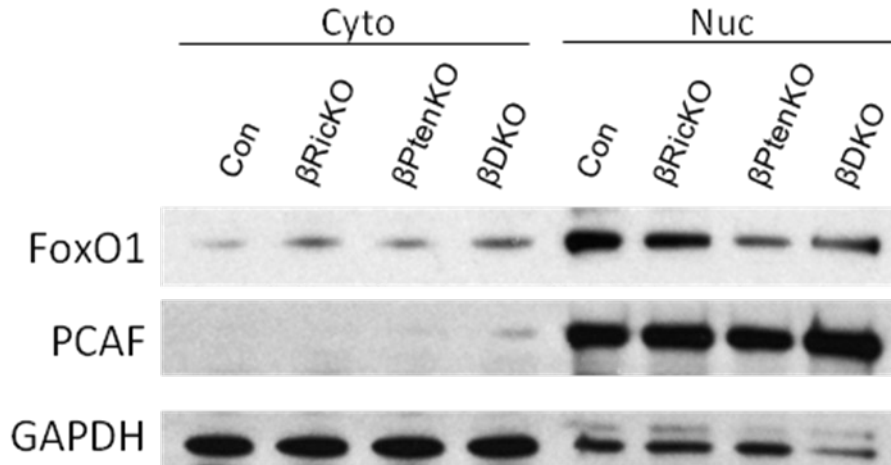

Supplement: supp_db10-1194_DB101194SupplementaryData.pdf [file supp_db10-1194_DB101194SupplementaryData.pdf]
